# Supplementary material
Source: publisher site journal article supplement (https://www.dovepress.com/article/321612)
Supplement: Supplementary file 1 [file get_supplementary_file.php]

**Supplementary materials**

Table S1. Sequences of primers for RT-PCR

| Gene | Forward sequence | Reverse sequence |
| --- | --- | --- |
| GRP78 | CATCACGCCGTCCTATGTCG | CGTCAAAGACCGTGTTCTCG |
| EDEM | CGGACGAGTACGAGAAGCG | CGTAGCCAAAGACGAACATGC |
| GADD34 | ATGATGGCATGTATGGTGAGC | AACCTTGCAGTGTCCTTATCAG |
| CHOP | GAACGGCTCAAGCAGGAAATC | TTCACCATTCGGTCAATCAGAG |
| XBP1s | GAGTCCGCAGCAGGTG | GTGTCAGAGTCCATGGGA |
| ATF4 | CCCTTCACCTTCTTACAACCTC | TGCCCAGCTCTAAACTAAAGGA |
| TBP | CCACTCACAGACTCTCACAACTG | CTGCGGTACAATCCCAGAACT |

Table S2. Antibodies for WB or immunohistology

| Antibody | Purpose | Company | Cat# | Dilution ratio |
| --- | --- | --- | --- | --- |
| anti-Ubiquitin | WB/IHC | Proteintech, USA | 10201-2-AP | 1:1000/1:200 |
| anti-GRP78 | WB | Proteintech, USA | 11587-1-AP | 1:1000 |
| anti-caspase 12 | WB | Proteintech, USA | 55238-1-AP | 1:1000 |
| anti-cleaved caspase 3(Asp175) | WB/IF | CST, USA | #9661 | 1:1000/1:400 |
| anti-alpha tubulin | WB | Proteintech, USA | 66031-1-Ig | 1:20000 |
| HRP-conjugated goat anti-rabbit | WB/IHC | Weiao, China | WB0177 | 1:10000/1:200 |
| HRP-conjugated goat anti-mouse | WB | Weiao, China | WB0176 | 1:10000 |
| FITC-goat anti-rabbit | IF | Weiao, China | WH1116 | 1：100 |
| Anti-Ki67 | IHC | Proteintech, USA | 27309-1-AP | 1:10000 |

WB, Western blot; IHC, immunohistochemistry; IF, immunofluorescence.


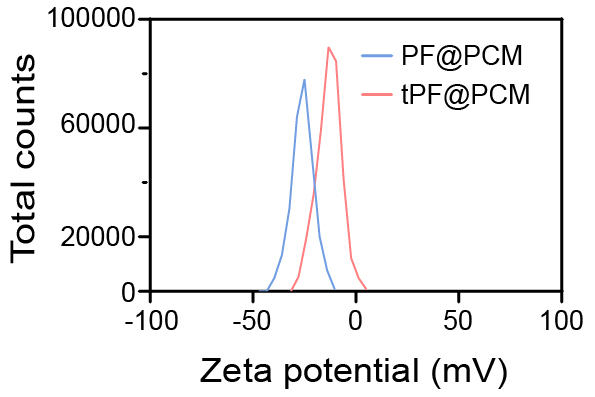


**Figure S1** Zeta potentials of PF@PCM and tPF@PCM in distilled water.


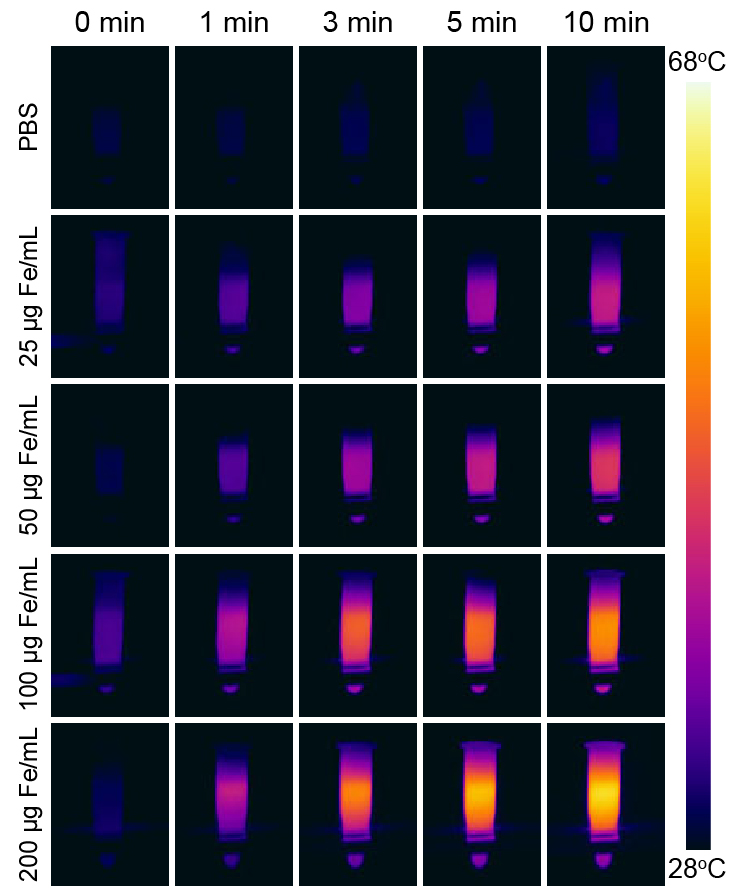


**Figure S2** Thermal imaging of tPF@PCM suspension (0-200 μg Fe/mL) under 808 nm laser irradiation (1.6 W/cm2, 10 min).


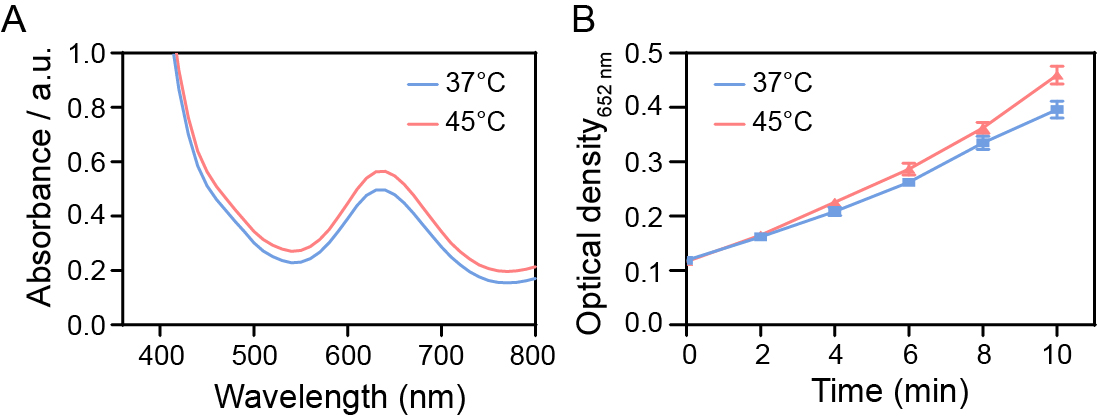


**Figure S3** (A) POD-like activity of bare Fe3O4 NPs at 37°C and 45°C maintained by laser irradiation for 10 min. (B) Time-dependent absorbance variation at 652 nm at different temperatures. Error bar, mean ± SEM.


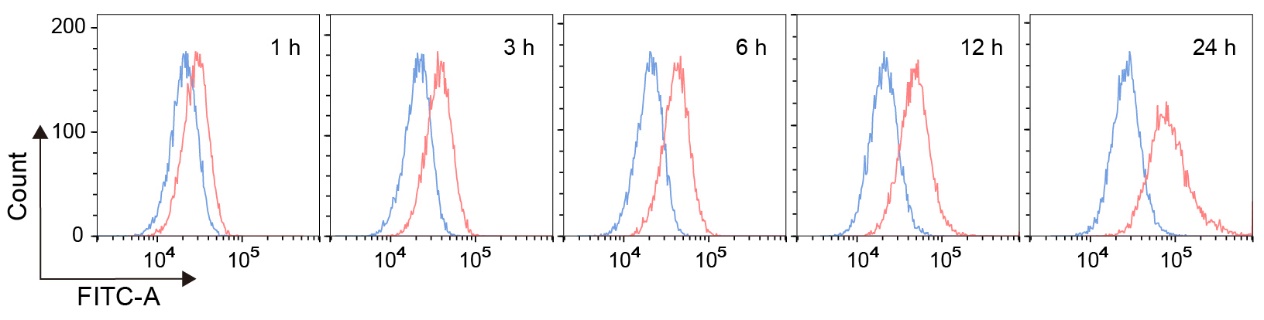


**Figure S4** Cellular uptake of FITC-labeled PF@PCM (50 μg Fe/mL, blue lines) and tPF@PCM (50 μg Fe/mL, red lines) at different time intervals determined by flow cytometry.


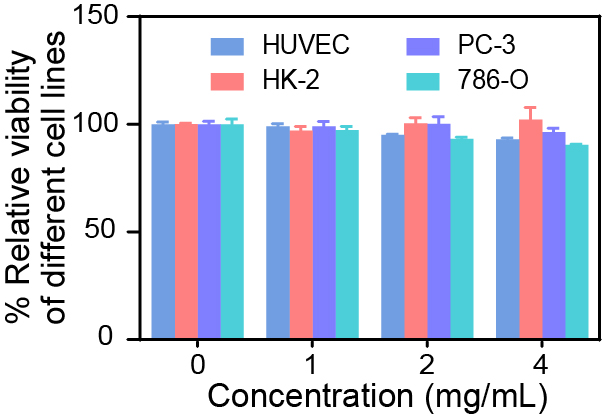


**Figure S5** Cytotoxicity evaluation of empty PCM vehicles against HUVEC, HK-2, PC-3, and 786-O cells at different concentrations (0-4 mg/mL) for 48 h.


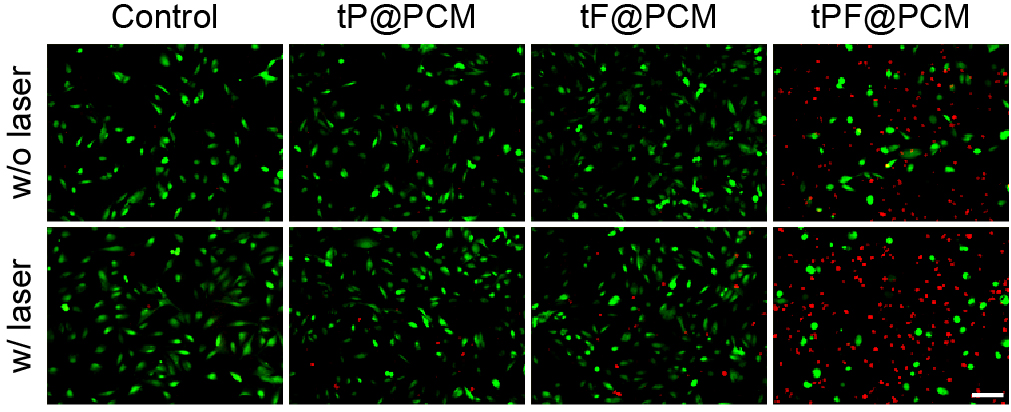


**Figure S6** Live/dead cell staining of 786-O cells after different treatments by Calcein-AM/7-AAD double staining kit. Green fluorescence represents live cells while red fluorescence indicates dead cells. Scale bar is 100 μm.


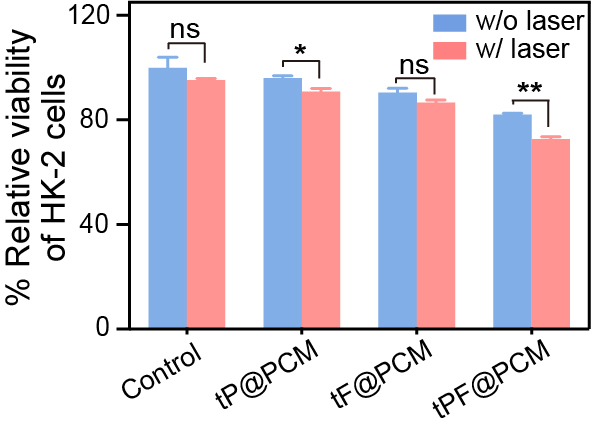


**Figure S7** Cytotoxicity evaluation of tP@PCM, tF@PCM, and tPF@PCM (5 μM for PR-619 and 150 μg Fe/mL for Fe3O4 NPs) against HK-2 cells with or without laser irradiation. **P* < 0.05; ***P* < 0.01; ns = *P* ≥ 0.05.


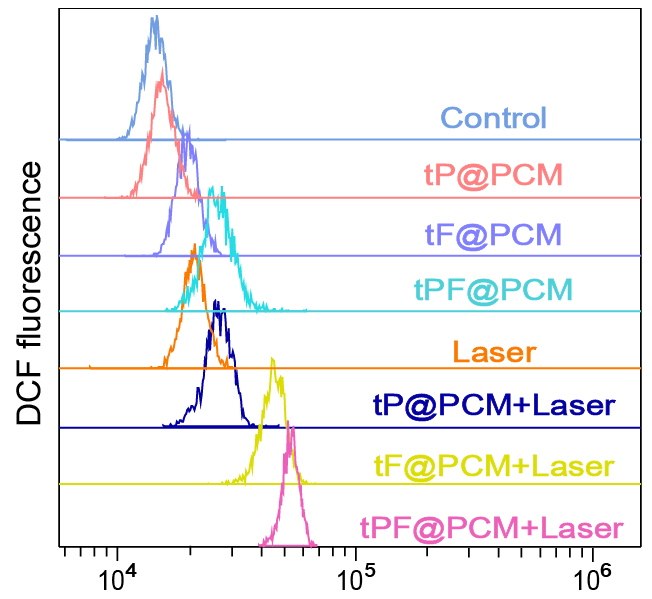


**Figure S8** Quantification of intracellular ROS levels in 786-O cells after different treatments by flow cytometry.


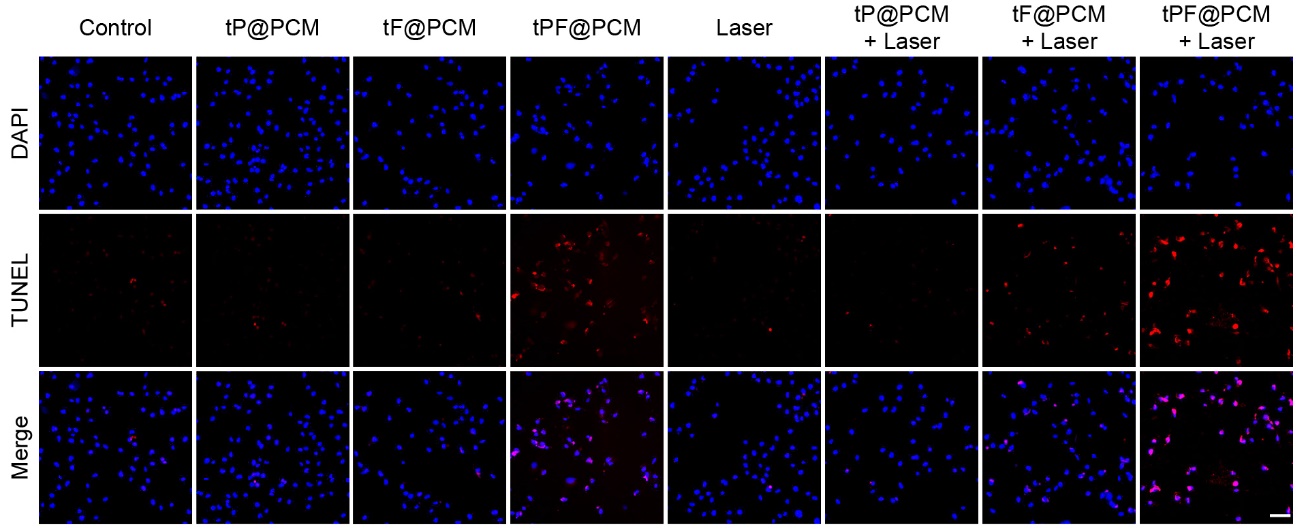


**Figure S9** TUNEL staining images of 786-O cells after different treatments. Nuclei were stained with DAPI (blue), and apoptotic cells were stained with TUNEL (red). Scale bar is 100 μm.


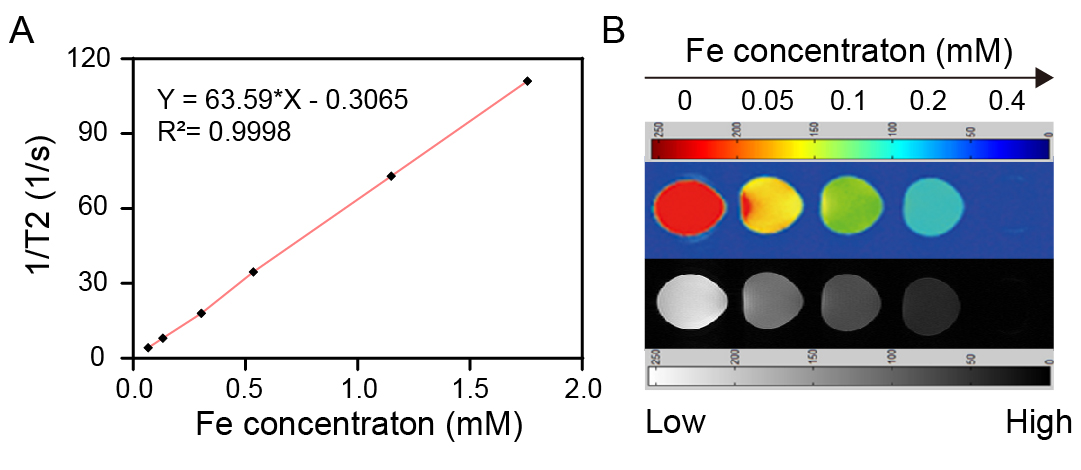


**Figure S10** (A) T2 relaxation rate plotted as a function of various Fe concentrations of tPF@PCM (0-2.0 mM). (B) T2-weighted MR images of tPF@PCM with different concentrations of Fe (0-0.4 mM).


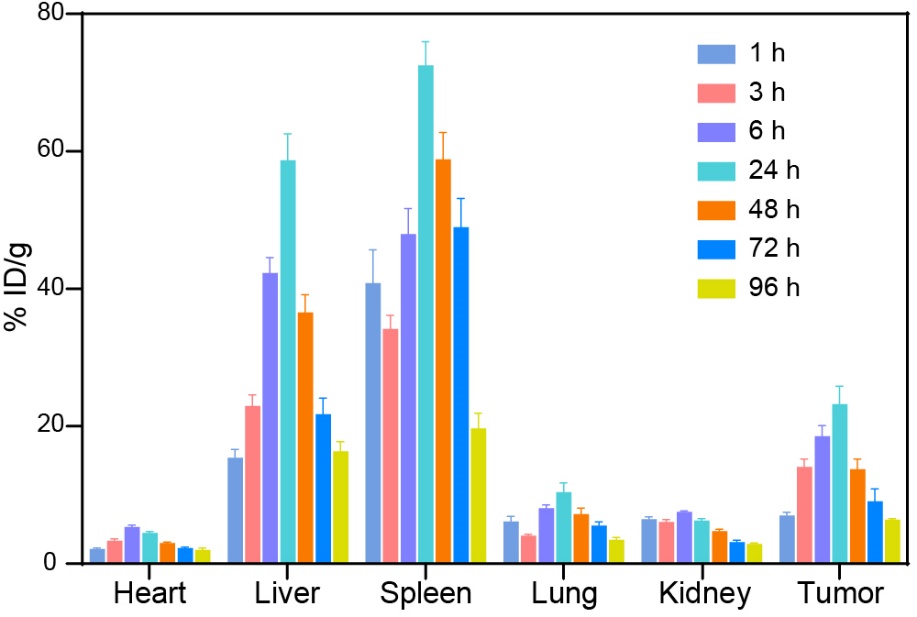


**Figure S11** Biodistribution of Fe in major organs and tumor in 786-O tumor-bearing mice measured by AAS after 1, 3, 6, 24, 48, 72, and 96 h post-injection of 15 mg Fe/kg BW of tPF@PCM *via* the tail vein.


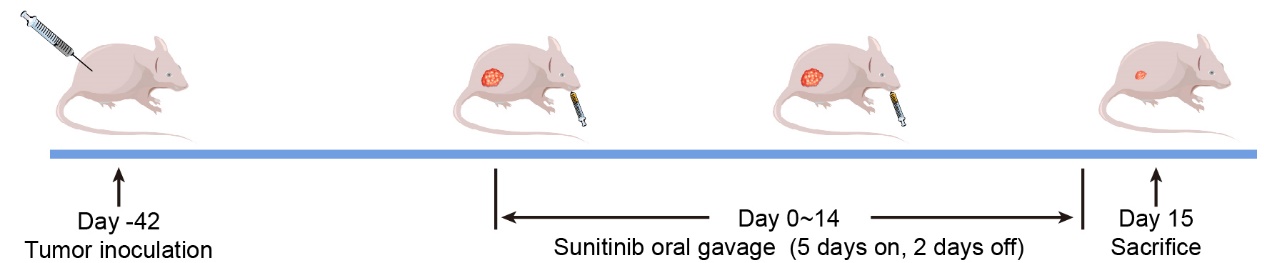


**Figure S12** Schematic of the treatment regimen for 786-O tumor-bearing mice receiving sunitinib treatment. Sunitinib was treated at 20 mg/kg BW by oral gavage on a 5-day-on/2-day-off cycle for two cycles.


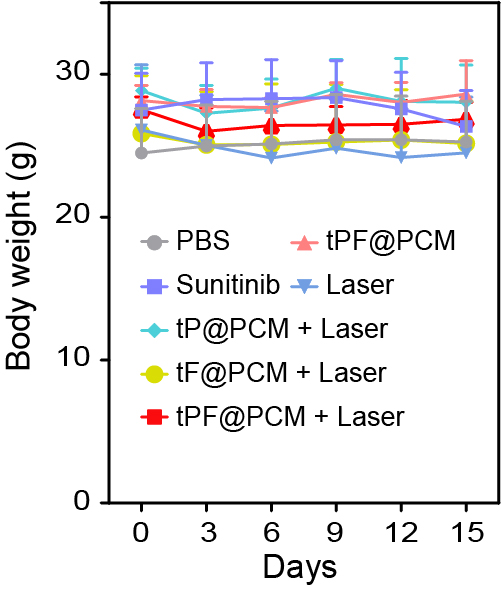


**Figure S13** Body weight changes of 786-O tumor-bearing mice in each group measured for 15 days post-treatment.
